# Supplementary material for: Influence of a chromophore analogue in the protein cage of a photoactive yellow protein
Source: Royal Society of Chemistry journal article supplement (doi:10.1039/c5pp00176e), 2015-07-03
Supplement: c5pp00176e1.pdf [file c5pp00176e1.pdf]

## Supplementary information

### Figure legend

#### Suppl. Fig. 1

Absorption spectra of PYP-CNs at various conditions, dark state, and 80msec after illumination.

#### Suppl. Fig.2

Model around the chromophore (PDBcode: 2phy). Figures show the distance between C atom at C=C double bond (attached with CN of CHCA analogue) and the closest atom of the near residues to the chromophore.

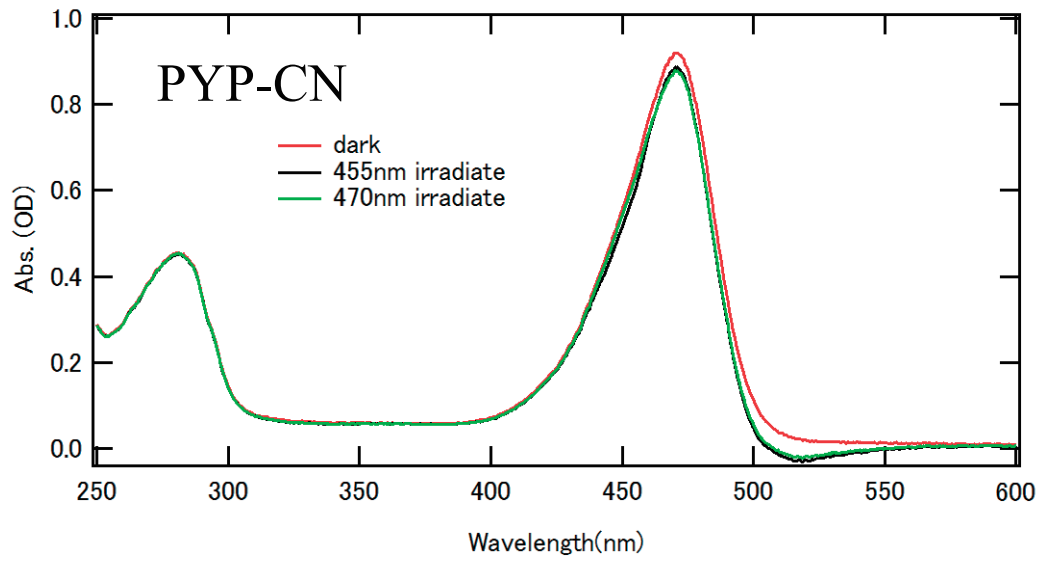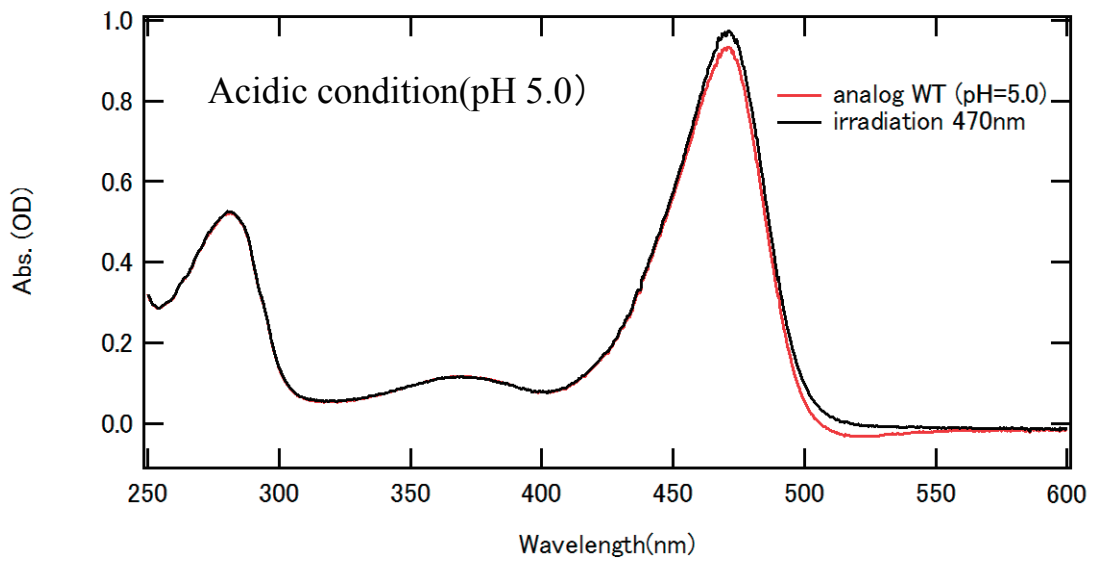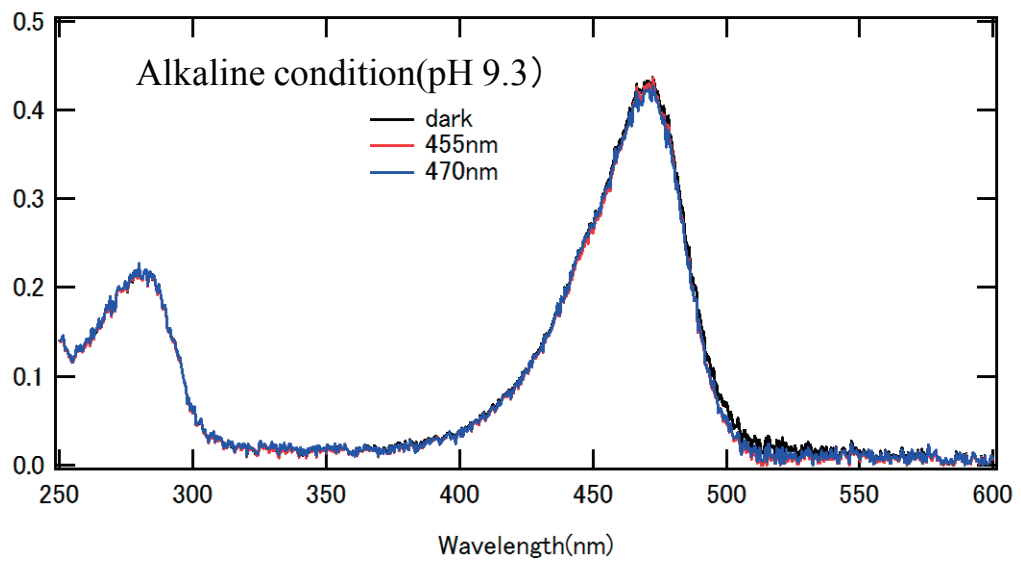

Suppl. Fig.1

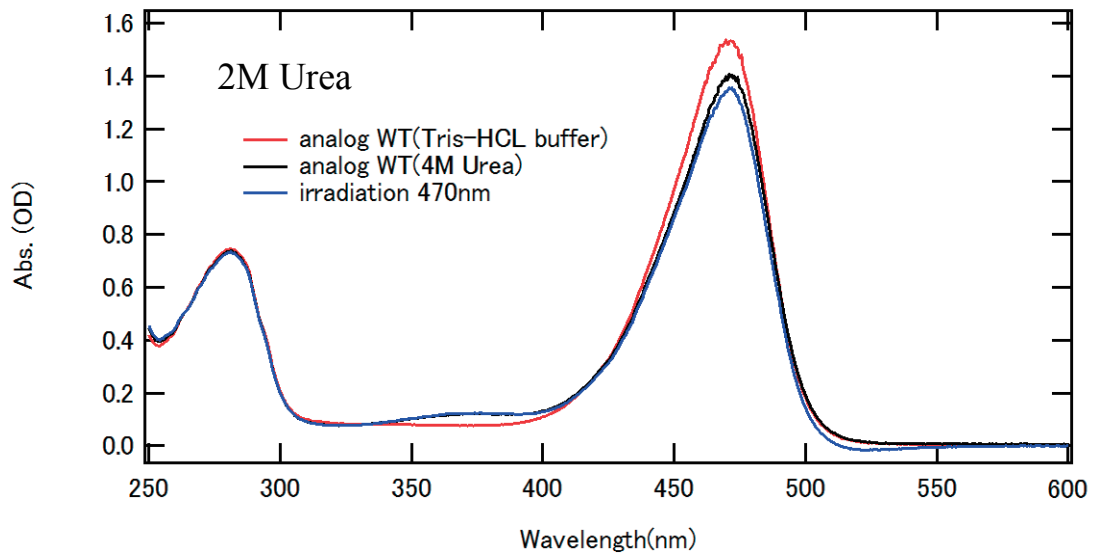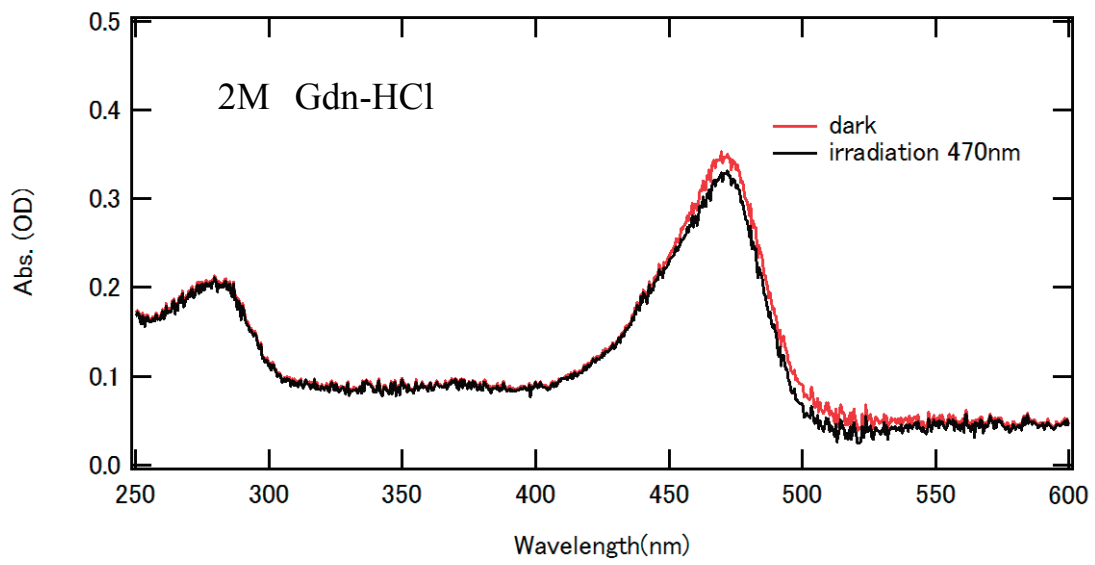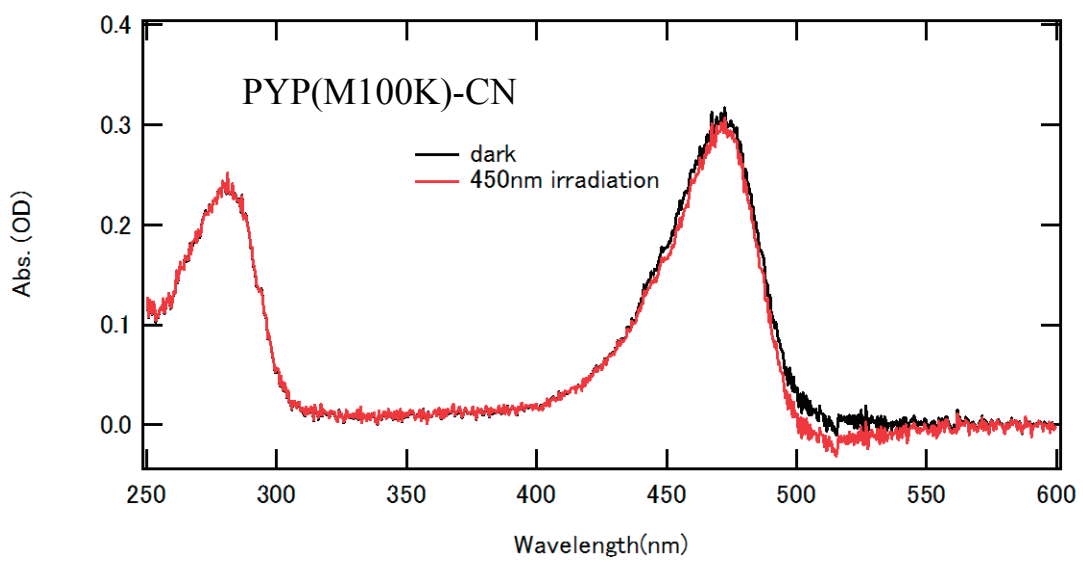

Suppl. Fig.1

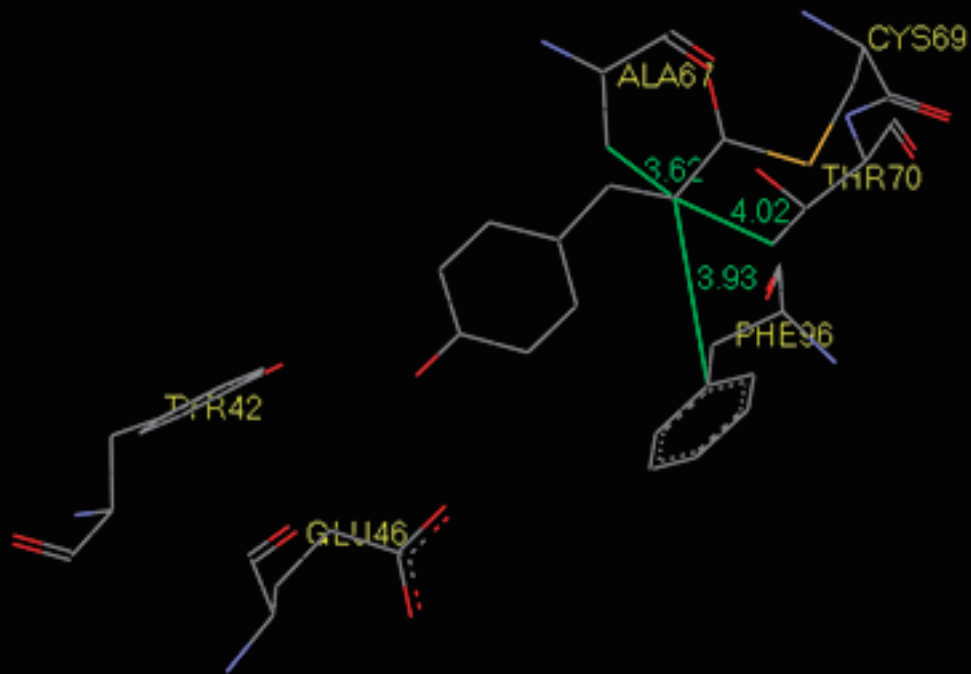

Suppl. Fig.2
